# Supplementary material
Source: Elsevier journal article supplement (https://www.sciencedirect.com/science/article/pii/S2173505021000054)
Supplement: mmc2 [file S2173505021000054:mmc2.docx]

**Supplementary material 2**

**Short Multidimensional Inventory Lifestyle Evaluation -CONFINEMENT (SMILE-C)**

| ***In the last month, how often in your daily routine…*** | ***Always*** | ***Often*** | ***Seldom*** | ***Never*** |
| --- | --- | --- | --- | --- |
| 1. Do you eat processed food (frozen food such as pizza, French fries, puff pastries, deep-fried foods and canned foods)? | 1 | 2 | 3 | 4 |
| 1. Do you eat fast-food, high-calorie sweet or fatty foods when you are stressed or sad? | 1 | 2 | 3 | 4 |
| 1. Do you eat healthy foods such as fresh fruits, fresh vegetables, wholegrain, legumes or nuts? | 4 | 3 | 2 | 1 |
| 1. Do you keep a regular meal schedule? | 4 | 3 | 2 | 1 |
| 1. Do you share your main meals with friends or family? | 4 | 3 | 2 | 1 |
| 1. Do you drink 5 or more doses (men) or 4 or more doses (women) of alcoholic beverages on a single occasion, which means within 2 hours? (1 dose of alcohol=1 glass of beer OR 1 glass of wine OR 1 shot of spirit (such as rum, vodka, whisky, tequila or gin)). | 1 | 2 | 3 | 4 |
| 1. Do you smoke tobacco (cigarette, electronic cigarette, cigar, pipe, smokeless tobacco)? | 1 | 2 | 3 | 4 |
| 1. Do you use marijuana or hashish? | 1 | 2 | 3 | 4 |
| 1. Do you use other drugs (cocaine, crack, amphetamines, ecstasy, opioids without medical prescription, and others)? | 1 | 2 | 3 | 4 |
| 1. Do you exercise for at least 30 minutes daily (or 150 minutes a week)? | 4 | 3 | 2 | 1 |
| 1. Do you make time to relax? | 4 | 3 | 2 | 1 |
| 1. Do you use any strategy or psychological support to deal with stress (for instance meditation, mindfulness or psychotherapy)? | 4 | 3 | 2 | 1 |
| 1. Do you use physical strategies to deal with stress (for instance yoga, tai-chi, exercise)? | 4 | 3 | 2 | 1 |
| 1. Do you practice a faith or religion? | 4 | 3 | 2 | 1 |
| 1. Do you feel that your life has a meaning? | 4 | 3 | 2 | 1 |
| 1. Do you feel grateful for the life you have? | 4 | 3 | 2 | 1 |
| 1. Do you manage to sleep between 7 and 9 hours per night? | 4 | 3 | 2 | 1 |
| 1. Do you feel rested with the number of hours you sleep? | 4 | 3 | 2 | 1 |
| 1. Do you maintain a regular sleep schedule? | 4 | 3 | 2 | 1 |
| 1. Do you use sleeping pills? | 1 | 2 | 3 | 4 |
| 1. Do you interact with your friends and/or relatives? | 4 | 3 | 2 | 1 |
| 1. Do you feel that you are part of a group of friends, the community or the society? | 4 | 3 | 2 | 1 |
| 1. Do you have someone you trust who listens to your problems or concerns? | 4 | 3 | 2 | 1 |
| 1. Do you have someone to help with everyday chores (for instance cooking, housekeeping, shopping)? | 4 | 3 | 2 | 1 |
| 1. Do you enjoy your leisure time? | 4 | 3 | 2 | 1 |
| 1. Do you make yourself available to support your significant ones? | 4 | 3 | 2 | 1 |
| 1. Do you spend time on a computer / smartphone within one hour of going to sleep? | 1 | 2 | 3 | 4 |
